# mm2-gb: GPU Accelerated Minimap2 for Long Read DNA Mapping

Juechu Dong\*  
joydong@umich.edu  
University of Michigan  
Ann Arbor, MI, USA

Xueshen Liu\*  
liuxs@umich.edu  
University of Michigan  
Ann Arbor, MI, USA

Harisankar Sadasivan  
hsadasiv@amd.com  
Advanced Micro Devices, Inc.  
USA

Sriranjani Sitaraman  
gina.sitaraman@amd.com  
Advanced Micro Devices, Inc.  
USA

Satish Narayanasamy  
nsatish@umich.edu  
University of Michigan  
Ann Arbor, MI, USA

## Abstract

Long-read DNA sequencing is becoming increasingly popular for genetic diagnostics. Minimap2 is the state-of-the-art long-read aligner. However, Minimap2's chaining step is slow on the CPU and takes 40-68% of the time especially for long DNA reads. Prior works in accelerating Minimap2 either lose mapping accuracy, are closed source (and not updated) or deliver inconsistent speedups for longer reads. We introduce *mm2-gb* which accelerates the chaining step of Minimap2 on GPU without compromising mapping accuracy. In addition to intra- and inter-read parallelism exploited by prior works, *mm2-gb* exploits finer levels of parallelism by breaking down high latency large workloads into smaller independent segments that can be run in parallel and leverages several strategies for better workload balancing including split-kernels and prioritized scheduling of segments based on sorted size. We show that *mm2-gb* on an AMD Instinct™ MI210 GPU achieves 2.57-5.33x performance improvement on long nanopore reads (10kb-100kb), and 1.87x performance gain on super long reads (100kb-300kb) compared to SIMD accelerated mm2-fast. *mm2-gb* is open-sourced and available at <https://github.com/Minimap2onGPU/minimap2>.

**Keywords:** MinION, nanopore, Long read sequence alignment, Minimap2, Chaining, GPU acceleration, HIP

## 1 Introduction

Long-read DNA sequencing offers the unique advantage of being able to span highly repetitive regions in the genome, thereby, enabling applications such as structural variant calling as well as de novo assembly [7, 14]. A recent study demonstrated the world's fastest blood-to-variants workflow using long-read sequencing to perform genetic diagnosis at the point of care [7]. Oxford-Nanopore Technology (ONT) [4] and Pacific Biosciences (PacBio) [2] are the two major platforms for long-read sequencing, and their accuracy, throughput and read lengths are improving with rapid advancements

in single-molecule sequencing technology. Jain et al. [9] reported ultra-long reads up to 882kb (N50 > 100kb) that enable assembly and phasing of 4-Mb Major Histocompatibility Complex (MHC) locus in its entirety.

Minimap2 [11] is the state-of-the-art long read mapper and aligner that maps DNA or long mRNA sequences against a reference database. Even though Minimap2 is well-engineered to handle noisy long reads 100kb, its CPU implementation struggles to keep up with the growing sequencing throughput (>1Tbp per day [17]). In particular, the chaining kernel in the seed-chain-align strategy of Minimap2 is an increasingly pronounced bottleneck for ultra-long reads. Time spent in chaining grows from 40% to 68% as average ONT read length grows from 2.25Kb to 127.11Kb [15]. This motivates us to accelerate Minimap2 for higher throughput on a GPU.

Unlike accelerating base-level alignment on GPU [6, 18], the chaining kernel is highly irregular and difficult to accelerate in terms of finding enough parallelism and balancing the workload. Prior attempts to accelerate chaining on GPU either sacrifice mapping accuracy [8] or suffer from diminishing benefits in long reads >20kb (mm2-ax [15]).

In this study, we introduce Minimap2-gigabases (*mm2-gb*), an enhancement over the mm2-ax through the incorporation of three optimization strategies aimed at augmenting intra-read parallelism and achieving more equitable workload distribution on GPUs. These optimizations include: segment cutting (Sec. 3.1), split score generation kernels (Sec. 3.2), and prioritized long segment scheduling (Sec.3.3.2). We break reads into independent segments to leverage intra-read parallelism. We configure three GPU kernels to process segments of different lengths separately, thus improving workload balancing within each kernel. We implement prioritized long-segment scheduling to improve inter-block workload balance. To this end, *mm2-gb* delivers a consistent speedup of 2.57-5.33x for chaining of coarse-grained long ONT reads (10kb-100kb) on AMD Instinct™ MI210 GPU [1] compared to mm2-fast, a vectorized version of Minimap2 running on 32

\*Both authors contributed equally to this research.

Intel®<sup>1</sup> Icelake cores with AVX-512 extension. *mm2-gb* delivers a 1.87x speedup on ultra-long ONT reads (100kb-300kb). Further, in Sec. 8 we discuss future work to potentially improve performance for ultra-long reads. *mm2-gb* supports HIP and CUDA runtimes and is open-sourced.

## 2 Background

### 2.1 Overview of Minimap2

Minimap2 is the most popular DNA/mRNA long sequence mapper and aligner for popular long-read sequencing platforms like Oxford Nanopore Technologies (ONT). It aims to process ultra-long reads of 100Kb on average at high throughput. Minimap2 performs long sequence mapping in three steps: seeding, chaining, and alignment (Fig. 1). Seeding identifies exact matches of short  $k$ -base minimizers (**anchors**) between the query and reference sequence. Seeding is fast because the references are pre-processed offline and indexed to a multimap hash table for quick lookup. Chaining takes anchors sorted by reference position as input and identifies sub-regions of the target reference that roughly map to each other. Minimap2 solves chaining as a 1-D dynamic programming problem. For workloads such as full genome or assembly alignment that requires base-level alignment, Minimap2 runs an alignment kernel using Needleman-Wunsch [12] with Suzuki-Kazahara [16] formulation to close the gaps between adjacent anchors in the chains. These gaps are usually short and are solved as a 2D dynamic programming problem.

### 2.2 Chaining is the Bottleneck

The chaining process takes sorted anchors as input and performs 1D dynamic programming to identify subsets of ordered anchors that are in linear alignment on the reference and query sequence. This is achieved by 1D-dynamic programming with a simple cost function: by sequentially going through the read, each anchor attempts to chain against its predecessor anchors that are less than  $max\_dist\_x$  bases apart on the reference sequence and selects the predecessor that generates the optimal chaining score. The chaining score is calculated as the optimal score of the predecessor plus a reward based on the gap between the anchor pair on the query and reference sequence. After generating optimal scores for all the anchors, Minimap2 performs backtracking and identifies primary chains. Among all the steps of chaining, the optimal score calculation is the most compute-intensive (>95% of chaining CPU time).

### 2.3 Quadratic Complexity of Chaining

Prior works [8, 10, 15] have found chaining to be the bottleneck in aligning long ONT reads with Minimap2 – 40% to 70% of CPU time is spent in chaining. The chaining kernel’s complexity is quadratic with respect to read length while

the seeding algorithm scales linearly. Additionally, recent advances in sequencing technologies promise ultra-long reads of 100kb on average with high throughput [9]. Therefore, it is fair to argue that chaining would become an even bigger bottleneck.

To perform a fair evaluation of chaining, we evaluate the performance of chaining kernels in chaining scores calculated per second, instead of anchors processed per second.

The compute-intensive step of chaining calculates the score between every anchor pair that are within a predefined distance on the reference sequence. Because the number of anchors within this distance is varied, anchors are not distributed evenly on the reference sequence – they are denser in regions where the reference maps well to the query. With higher anchor density, an anchor in these regions finds more predecessors within  $max\_dist\_x$  bases, leading to significantly more anchor pairs to compute scores with during chaining. To demonstrate the effects of uneven distribution, Fig. 2 shows that the average amount of score generations grows with read length, because there are more compute-dense regions in long reads, while the anchors per base remains stable. We argue that using scores generated per second instead of anchors per second as the metric of chaining evaluation reflects real performance more accurately.

## 3 Design

In this work, we design *mm2-gb*, a GPU chaining kernel for Minimap2 that does not compromise on mapping accuracy and delivers consistent performance on reads of various lengths, including ultra-long reads (>100kb). We show that *mm2-gb* delivers consistent speedup on coarse-grained long reads (10kb-100kb) compared to *mm2-fast* [10], a SIMD-vectorized version of Minimap2 on 32 Intel®<sup>1</sup> Icelake cores with AVX-512 extension. Another prior work, *mm2-ax* [15], relies on CPU to pre-process the reads and provides decent speedups on GPU for reads <20kb, but fails to deliver consistent speedups for longer reads, where chaining becomes a more pronounced bottleneck due to its quadratic compute complexity.

We introduce three major optimizations to improve intra-read parallelism and workload balancing: segment cutting, split score generation kernels, and prioritized long segment balancing. Segment cutting breaks reads independent segments and allows *mm2-gb* to process them in parallel. We split the computational intensive score generations kernel into three sub-kernels, each specialized in handling short (<2k anchors), mid (2k-10k anchors), or long (>10k anchors) segments. We then enhance the long segment score generation kernel with prioritized ultra-long segment scheduling to improve workload balance between GPU thread blocks.

To this end, we build a range selection kernel on GPU that performs forward range selection and identifies independent segments within a read. Independent segment identification

<sup>1</sup>Intel is a trademark of Intel Corporation or its subsidiaries

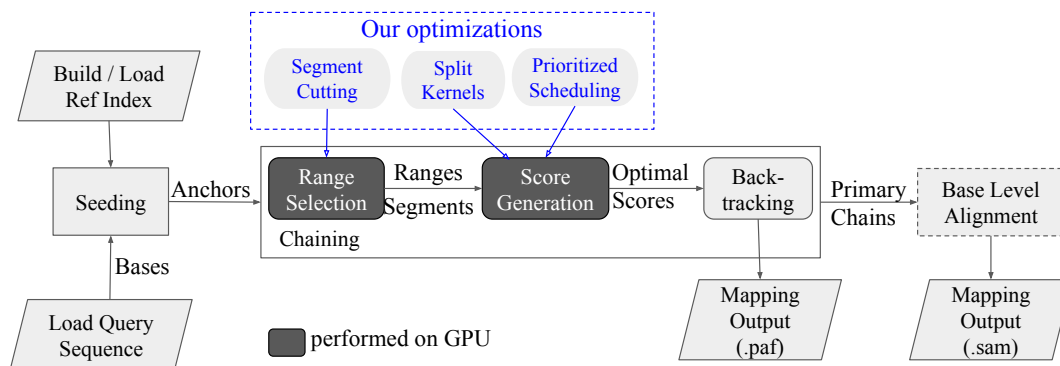

**Figure 1.** Minimap2 Workflow: Steps of chaining performed on the GPU is shown in dark grey blocks. Our optimizations to GPU kernels are shown in the blue box.

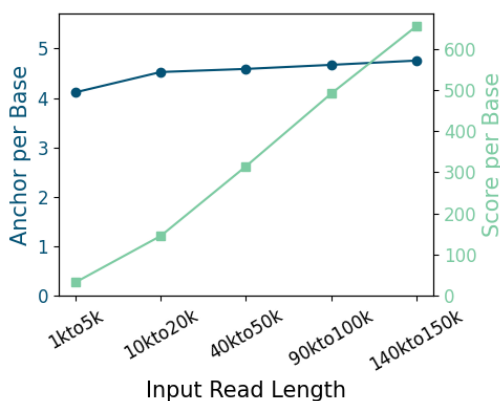

**Figure 2.** Longer reads have more chain scores to be generated per base while the total number of anchors per base remains almost the same. X-axis shows query datasets of different read lengths.

eliminates the need to sequentially process all the anchors in a read with a single thread block on the GPU and instead enables multiple blocks to work on different segments of a read in parallel. The split-kernel design helps us navigate the difficulty in launching a single kernel that handles workloads of different sizes in a balanced manner. Instead, the split-kernel method relies on three independent kernels optimized to better handle segments of different compute densities (short, medium, and long). Finally, we improve workload balancing by applying atomic operation-based prioritized scheduling and long segment aggregation to amortize the latency of ultra-long segments.

We compare our GPU-accelerated Minimap2 (*mm2-gb*) on GPU to SIMD-accelerated *mm2-fast* by mapping real ONT reads to human genome reference. We show that *mm2-gb* generates identical mapping results as *mm2-fast* and delivers 2.57x-5.33x speedup on coarse-grained long reads (10kb - 100kb). *mm2-gb* supports HIP and CUDA environments on

AMD and NVIDIA GPUs. *mm2-gb* is an open-sourced and accelerated implementation of Minimap2 without compromising mapping accuracy.

### 3.1 Improve GPU Occupancy by Breaking Down Reads into Segments

To maximize the occupancy on data center GPUs such as AMD Instinct™ MI210 which can run 208k threads in parallel, it is crucial to identify sufficient parallelism in the optimal score generation step of chaining. Similar to *mm2-ax*, *mm2-gb* leverages inter-read and intra-range parallelism at the grid and block levels, respectively, in the score generation kernel. Intra-range parallelism arises from threads within a block performing forward score generation between the successors within range against a given anchor. Inter-read parallelism emerges from the data parallelism between different reads.

To address the lack of parallelism in long ONT reads (>20kb) and achieve higher GPU occupancy, *mm2-gb* introduces a new level of parallelism, intra-read parallelism, to long-read chaining. Instead of serializing the optimal score generation for all the anchors in the same read, *mm2-gb* divides a read into multiple independent segments and processes them in parallel. This is done carefully to avoid violating data dependencies between finding the optimal chain score of an anchor and its possible predecessors. *mm2-ax* [15] demonstrated that 67% of the input anchors have a successor range of zero and do not start a chain. We observe that the anchors succeeding such a zero-range anchor are too distant to chain against it or any of its predecessors. Therefore, the chain scores for anchors succeeding the zero-range anchor are not dependent on its predecessor scores or itself. This enables us to cut reads at zero-range anchors and process these segments independently. We perform segment cutting in the successor range selection kernel on GPU (Algorithm 1).

Our parallel segment-cutting algorithm is designed to divide reads into short segments, each approximately the size

of one range selection block (512 in our evaluated configuration). In the range selection kernel, each thread is tasked with calculating the successor range for one anchor in the read. The last few threads in each block (10 threads in our evaluated configuration) attempt to update the cut position with their anchor index if they encounter a zero-range anchor. Consequently, our algorithm effectively partitions reads into segments of 512 anchors, unless none of the last 10 threads encounters a zero-range anchor. This algorithm introduces minimal overhead to the range selection kernel and yields segments with an average length of 546.9 anchors on a subset of the 60x HG002 ONT dataset (average read length 45kb).

### Algorithm 1 Segment Cutting In Range Selection Kernel

---

**Input:**  $A: \{a_1, a_2, \dots, a_n\}$  List of sorted anchors  
**Output:**  $R: \{r_1, r_2, \dots, r_m\}$  - List of successor ranges for anchors in a read.  
**Output:**  $Cut: \{c_0, c_1, \dots, c(n//BLOCKDIM)\}$  - List of cut positions.

```

1: constant BLOCKDIM = 512
2: for tid ← threadIdx do                                ▶ Each thread
3:   for i ← tid to n step BLOCKDIM do
4:      $R[i] \leftarrow range\_selection(A, i)$  ▶ Successor Range Selection
5:     if tid is among the last 10 threads in a block then
6:       if  $R[i] == 0$  then                                ▶ This is a zero-range anchor
7:          $Cut[i//BLOCKDIM] \leftarrow i$  ▶ Attempt to cut
8:       end if
9:     end if
10:  end for
11: end for

```

---

### 3.2 Split Score Generation Kernels: Specialize Kernels for Different Range Profiles

In mm2-ax [15], Sadasivan et al. report that the chaining kernel has highly irregular arithmetic intensity and intra-range parallelism, characterized by a high variance in the successor range. We extend this idea by measuring workload in terms of chaining scores computed to reflect the mapping cost more accurately. The statistics on a dataset subset from 60x HG002 ONT [5] shows that 93.5% of anchors have a range less than 64, but they only form less than 2% of the anchors-pairs that require a score calculation. The successor ranges of the remaining 6.5% anchors follow a long-tail distribution (Fig. 3a). The score calculation workload is distributed across anchors of different range profiles (Fig. 3b), and exhibits different arithmetic intensity and intra-range parallelism. It is hard to design one kernel that suits all the anchors with different range profiles.

To overcome this irregularity, we develop three separate kernels, short, mid, and long, to handle anchors of various ranges. We distribute anchors into the three different kernels based on the correlation between the segment length and average anchor range.

The short kernel is optimized for anchors with a range shorter than the wavefront size (<64 threads). Each block in the short kernel contains only one wavefront that is executed

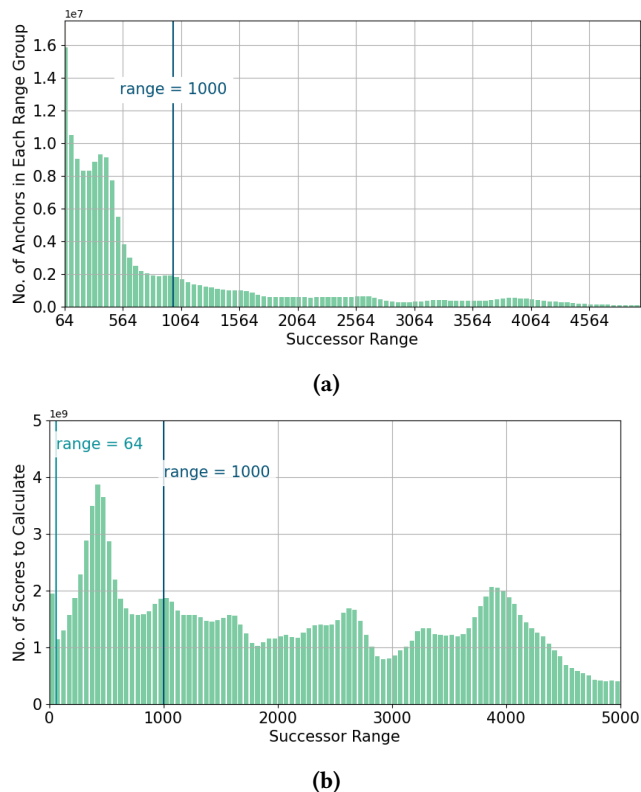

**Figure 3.** Successor range distribution is highly imbalanced. (a) Anchors with a range >64 follow a long-tail distribution (b) Workload is broadly distributed among anchors of different range profiles.

in lock-step to avoid block synchronization between iterations. This also allows us to fit a larger grid dimension on the device to better leverage the inter-segment parallelism. The mid-kernel is optimized for anchors with more intra-range parallelism to benefit from a larger block size of 512. The long kernel is optimized for anchors with long ranges (>1024) and needs 1024 threads to work on forward score generation in parallel.

Through our analysis of the range profile of segments, we find that anchors in longer segments tend to have a larger average range (Fig. 4a). Because segment is the minimum parallel unit due to succeeding dependency, by assigning segments into short, mid and long kernels based on their length, anchors are distributed into appropriate chaining kernels. From a zoomed-in view (Fig. 4b), we find segments shorter than 2k anchors have an average range of less than 64 and are optimal workloads for the short kernel. *mm2-gb* assigns the segments of medium length (2k-10k anchors) to the mid kernel and leaves segments in the long tail to the long kernel (Fig. 5). Note that the long kernel is responsible for generating 86% of the scores, and therefore an optimized long kernel is the key to achieving high chaining throughput.



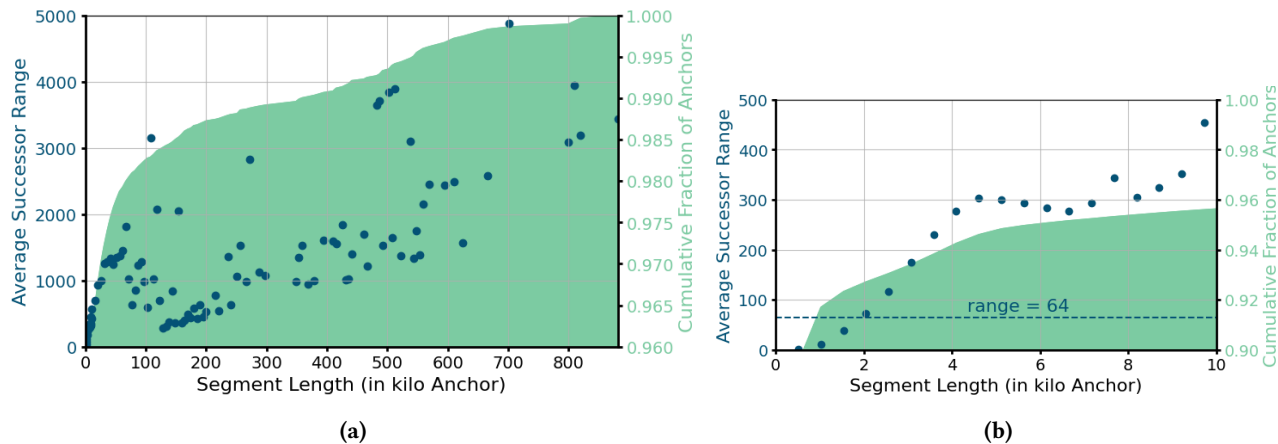

**Figure 4.** Long segments consist of anchors with larger range profiles. (a) The number of anchors in long segments follows a long tail distribution up to 1 million. (b) Zoom-in View (segments <20k anchors): Segments less than 2k anchors long have an average range less than 64.

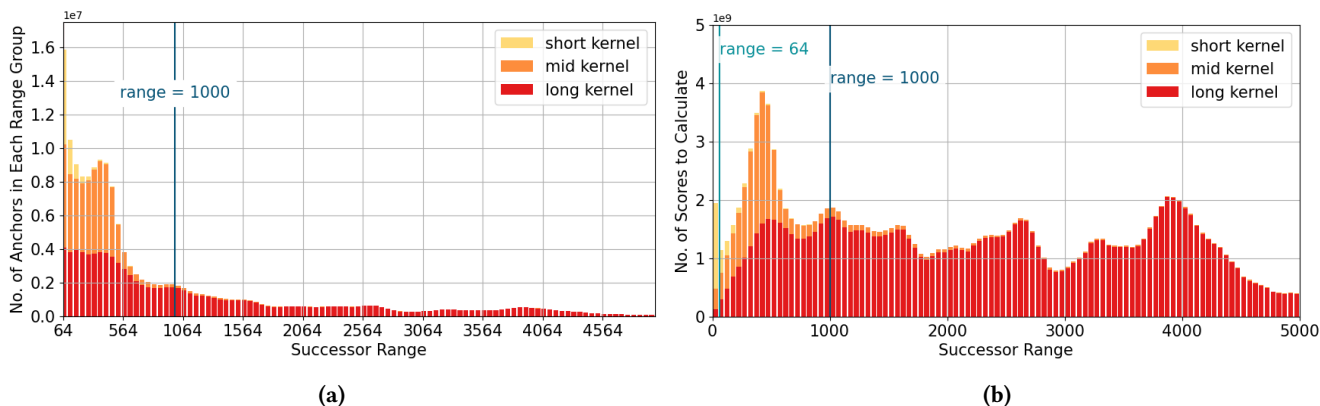

**Figure 5.** Anchors of different range profiles are assigned to their respective kernels. (a) Most anchors assigned to the mid kernel have a range <512. Half of the anchors between 64 to 512 in range are assigned to the long kernel. (b) The long kernel handles a majority (86%) of total work.

### 3.3 Long Kernel Scheduling

The runtime of the long kernel is bounded by the latency of processing ultra-long segments that can be up to 1 million anchors long. There are only a few ultra-long segments in a batch, but anchors in each ultra-long segment are handled sequentially by a single compute unit (CU). *mm2-gb* implements long segment aggregation and prioritized segment scheduling to improve the overall throughput of the long kernel in the presence of ultra-long segments.

**3.3.1 Long Segment Aggregation.** The key to improving throughput for the long kernel is to identify enough long segments to fully occupy all 104 CUs on an AMD Instinct™ MI210 GPU. Reads are processed in batches sized to fit the 64 GB of High Bandwidth Memory (HBM) capacity in an MI210 GPU. From this batch, a small proportion of segments are long. The occupancy of the long kernel processing this small

set of long segments from one batch is very low, only around 20.2%. To remedy this, we aggregate enough long segments from multiple input batches and launch a single long kernel to process all of them (Fig. 6). A buffer sized 15% of MI210’s HBM capacity can hold aggregated long segments from 4-5 batches of reads, and increase the CU occupancy to 85.5%.

**3.3.2 Prioritized Segment Scheduling.** In the long kernel, segments in descending order of lengths are scheduled to persistent blocks that remain active throughout the kernel runtime. This helps improve workload balance between blocks. After aggregating long segments from multiple batches of reads, *mm2-gb* sorts them by length in descending order. As proposed in Algorithm 2, once launched, each block in the long kernel pops the longest segment from the queue, processes it, and then pops the next in the queue to process until the queue is empty. This algorithm guarantees

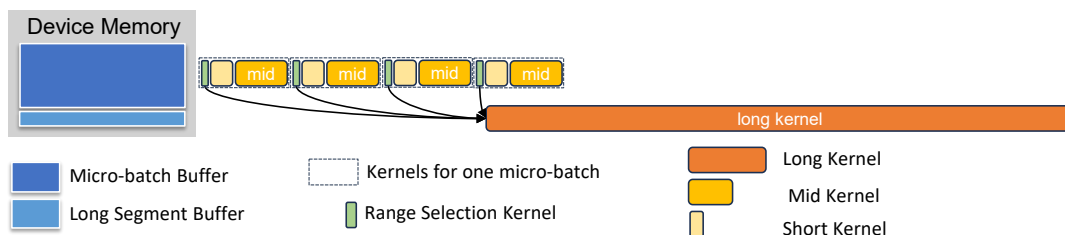

**Figure 6.** Aggregating long segments from multiple micro-batches into one long score generations kernel.

that: 1) Latency-bounded ultra-long segments are scheduled first. 2) Blocks that complete processing a segment early automatically get scheduled more work. As illustrated in Fig. 7, prioritized segment scheduling significantly improves block-level workload balance in the long score generation kernel.

---

**Algorithm 2** Prioritized Segment Scheduling In Long Score Generation Kernel

---

**Input:**  $Q: \{s_1, s_2, \dots, s_m\}$  - List of long segments, sorted by length  
**Output:**  $P: \{p_0, p_1, \dots, p_n\}$  - List of optimal predecessors  
**Output:**  $F: \{f_0, f_1, \dots, f_n\}$  - List of optimal score

```

1: for  $bid \leftarrow \text{blockIdx}$  do                                ▶ Each block
2:    $\_shared\_s$                                              ▶ Current segment of the block
3:   while  $Q$  is not empty do
4:      $s \leftarrow Q.pop()$                                 ▶ Get next segment
5:      $\_synctreads()$ 
6:      $\{P[i], F[i]\}_{i \in s} \leftarrow \text{score\_generation}(s)$  ▶ Score generation
7:   end while
8: end for

```

---

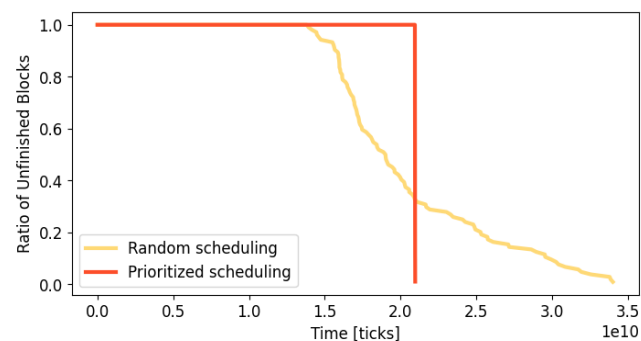

**Figure 7.** Inter-block workload balance of long score generation kernel with and without prioritized segment scheduling. Prioritized scheduling significantly reduces tail latency.

## 4 Evaluation

### 4.1 Experiment Setup

We accelerate Minimap2 v2.24, which is the same version used by mm2-fast [10]. Because mm2-ax is tied to an older version of mm2-v2.17, is built to work on an NVIDIA A100

GPU and is close-sourced to be tweaked for benchmarking, we didn't use it as our baseline. Instead, we use SIMD accelerated mm2-fast and Minimap2 on GPU without our optimization (see Fig. 1) as baselines. Because mm2-ax also uses mm2-fast as its baseline, we are still able to compare *mm2-gb* with mm2-ax qualitatively. We demonstrate the benefits of our optimizations using AMD Instinct™ MI210 GPU on the AMD Accelerator Cloud (AAC) cluster [3]. Our performance is evaluated on a single AAC node containing 512GB of host memory and one AMD Instinct™ MI210 GPU with 64GB of HBM memory. We run mm2-fast on a server with 125GB memory and a 32-core Intel®<sup>1</sup> Xeon®<sup>2</sup> Gold 6326 CPU, which supports AVX512. Our test data is extracted from Oxford Nanopore Technologies (ONT)'s 60X HG002 dataset [5]. To demonstrate our performance gain on different read lengths, especially long reads, we allocate five bins based on read lengths (1k-10k, 10k-20k, 40k-50k, 90k-100k, and 100k-300k bases) and assign 5Gb of reads into each of them (similar to coarse-grained workload in mm2-ax [15]).

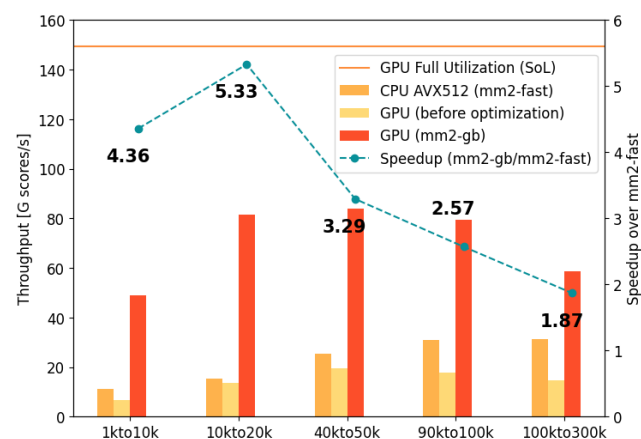

**Figure 8.** Maximum throughput in terms of scores generated per second, where *mm2-gb* achieves 1.87-4.36x speedup over mm2-fast.

<sup>2</sup>Xeon is a trademark of Intel Corporation or its subsidiaries

## 4.2 Summary of Results

Experiment results in Fig. 8 show *mm2-gb* achieves 2.57-5.33x speedup over *mm2-fast* in processing long reads (10k-100k) and 1.87x for super long reads (100kto300k). These coarse-grained long-read datasets are challenging to be parallelized on the GPU and *mm2-ax* achieves speedups downwards of 2x over *mm2-fast*, without the manual grouping of reads. We achieve 4.36x speedup on short reads (1kto10k), compared to up to 10x for *mm2-ax*. Potential reasons for the slowdown are discussed later in Sec. 7.

Our *mm2-gb* on GPU maintains 50-60% of theoretical max throughput in processing long reads (10k-100k), and achieves 39% theoretical max throughput on super long reads (100k-300k), while before optimization it was at less than 15%. For short reads (1k-10k), because the low average range leads to a low workload intensity, we observe a 33% theoretical max throughput.

Accelerating chaining for mapping long DNA reads is a challenging task on GPU because of its long latency and low hardware occupancy. The results demonstrate that our efforts in splitting workload and improving workload balance makes a big difference. Compared with previous works like *mm2-ax*, our acceleration doesn't require users to manually assign short reads to run concurrently with long reads (i.e. generate fine-grained datasets) to saturate the occupancy when mapping long read datasets, instead, by introducing the finer levels of parallelism in the segment, *mm2-gb* automatically schedules segments of different lengths to ensure the workload are distributed equally on each CU.

In summary, *mm2-gb* overcomes the latency issue in processing long and super-long reads, and achieves significant improvement over SIMD-accelerated *mm2-fast* and previous GPU-accelerated versions of *mm2*.

## 5 Conclusion

Chaining kernel performance is crucial for constructing a high-throughput long-read aligner capable of adapting to the increasing read lengths. However, it remains slow in the state-of-the-art long-read aligner *Minimap2*, consuming 40-68% of the total runtime. To address this bottleneck, we present *Minimap2-gigabases (mm2-gb)*, a GPU-accelerated version of *Minimap2* tailored for high throughput long-read chaining while maintaining the same accuracy. *mm2-gb* improves GPU workload balance and occupancy within the irregular chaining kernel by cutting long reads into independent segments of different arithmetic intensities. These segments are then handled by separate kernels, with long segments aggregated and prioritized within the kernel. In comparison to AVX512 accelerated *mm2-fast*, our evaluations demonstrate that *mm2-gb* running on an AMD Instinct™ MI210 GPU achieves a 2.57-5.33x performance improvement on long reads (10kb-100kb) and a 1.87x performance gain on ultra long reads (100kb-300kb).

## 6 Related Works

A few prior works have attempted to speed up *Minimap2*. *Zeni et al.* [18] and *Feng et al.* [6] sped up the base-level alignment step, which is no longer the bottleneck as read lengths have increased. Some of the works that have accelerated chaining are either closed source [15], low in accuracy [8], or do not completely exploit the parallelism in chaining [10]. *Guo et al.* [8] introduced the concept of forward transforming the chaining algorithm and accelerated it on GPU and Field Programmable Gate Array (FPGA). However, their work does not guarantee output equivalence to *mm2*. Their decrease in mapping accuracy, as pointed out by *Sadasivan et al.* [15], is primarily due to *Guo et al.*'s static predecessor range selection, which differs from the dynamic selection in *mm2*, and because the rules for updating chaining scores were not modified in line with the forward transformation. Another study, *mm2-fast* [10], accelerates all three steps in *mm2* using Single Instruction Multiple Data (SIMD) CPUs. While *mm2-fast* does parallelize the generation of chain scores, *Sadasivan et al.* [15] identified certain sections of chaining that are not parallelized. *Sadasivan et al.* [15] found that 34.08% of the total time spent generating chain scores and finding the maximum scores at the start and end of chains by *mm2-fast* is spent in sequential code and is not parallelized. *mm2-ax* [15] attempts to improve upon *mm2-fast* by forward transforming the chaining step while maintaining high accuracy. *mm2-ax*'s findings have motivated some of the strategies we have investigated in this work. Despite *mm2-ax* doing a good job at exploiting more parallelism in chaining, we identify several areas for improvement. *mm2-ax*'s workload scheduling is not designed to deliver consistent performance for longer read lengths, is fine-tuned for and requires NVIDIA A100 GPUs, is closed-source, and tied to an older version of *mm2-v2.17*. We compare with respect to *mm2-fast* because it is based on the latest *mm2-v2.24*, which is considered accurate for diagnostics.

## 7 Discussion

We profile the most time-consuming kernel of *mm2-gb*, the long score generation kernel on an ultra-long read ONT dataset (reads between 90kb-100kb extracted from 60x HG002 dataset) with *Omniperf v1.0.10* [13]. As illustrated in Table 1, the long score generation kernel does not fully saturate L1, L2, or HBM memory bandwidth. However, as shown in Tab. 2, both the issue pipeline and vector ALU are underutilized, with more than 70% of CU cycles being consumed by dependency stalls while awaiting data from the memory system. With a high L2 hit rate of 98%, a low L1 hit rate of 68%, and an average L1 latency of 216 cycles, we infer that the long score generation is constrained by L2 data fetch latency resulting from L1 capacity misses.

| Vector L1 Cache |            | L2 Cache |            |
|-----------------|------------|----------|------------|
| Hit rate        | 68%        | Hit rate | 98%        |
| Lat.            | 216 cycles | Lat.     | 128 cycles |
| BW util.        | 16.83%     | BW util  | 0.54%      |

**Table 1.** Cache statistics for long score generation kernels, as reported by omniperf.

| Compute Unit Utils |        | CU Cycle Breakdown |        |
|--------------------|--------|--------------------|--------|
| VALU Util          | 32.57% | Dependency Wait    | 73.50% |
| IPC-Issue Util     | 19.91% | Issue Wait         | 8.18%  |
|                    |        | Active Cycles      | 18.93% |

**Table 2.** CU statistics for long score generation kernels, as reported by Omniperf

## 8 Future Work

### 8.1 Long Kernel: Shared Memory Prefetch

Our long score generation kernel is memory latency bound. However, we observe marginal benefits from L1 prefetching as opposed to mm2-ax. mm2-ax opted for L1 prefetching over shared memory prefetching due to limited temporal locality unified score generation kernel, whereas mm2-gb's long kernel operates on aggregated long segments with extended predecessor ranges. These long-range segments exhibit greater data reuse between iterations, and the working set size of a block (estimated to be the size of anchors in the range) is also larger. For instance, in a segment with an average range of 3k anchors, the working set size of the block processing this segment is estimated to be  $7B/anchor \times 3Kanchors = 27KB$ . An AMD Instinct™ MI210 device can accommodate two long score generation blocks on one CU, sharing a 16KB L1 cache and a 64KB shared memory. The working set fits within the shared memory but exceeds the capacity of the L1 cache. Therefore, we anticipate that the long score generation kernel will benefit from shared memory prefetching, and we plan to implement it in our future updates.

## 9 Acknowledgments

We thank the AMD Accelerator Cloud team for actively supporting us with computing infrastructure. This work was also supported by the Kahn Foundation (S.N.).

## 10 Availability

### 10.1 Software

mm2-gb is open-sourced and available at <https://github.com/Minimap2onGPU/minimap2>.

### 10.2 Datasets

Datasets are publicly available with CC0 license from Human Pangenome Reference Consortium: [https://github.com/human-pangenomics/HG002\\_Data\\_Freeze\\_v1.0](https://github.com/human-pangenomics/HG002_Data_Freeze_v1.0) [5].

## References

- [1] AMD Instinct™ MI210 Accelerators. *Advanced Micro Devices*. <https://www.amd.com/en/products/accelerators/instinct/mi200/mi210.html>, Feb 2022.
- [2] Pacbio. *PacBio*. <https://www.pacb.com/>, Mar 2024.
- [3] AMD accelerator cloud. *Advanced Micro Devices*. <https://community.amd.com/t5/instinct-accelerators/take-a-test-drive-in-the-amd-accelerator-cloud/ba-p/500901>, Dec 2024.
- [4] ONT products. *Oxford Nanopore Technologies*. <https://nanoporetech.com/products>, Mar 2024.
- [5] Human Pangenome Reference Consortium. HG002 data freeze (v1.0) ONT 60x coverage reads. *Amazon Web Services*. [https://s3-us-west-2.amazonaws.com/human-pangenomics/index.html?prefix=NHGRI\\_UCSC\\_panel/HG002/hpp\\_HG002\\_NA24385\\_son\\_v1/nanopore/downsampled/standard\\_unsheared/](https://s3-us-west-2.amazonaws.com/human-pangenomics/index.html?prefix=NHGRI_UCSC_panel/HG002/hpp_HG002_NA24385_son_v1/nanopore/downsampled/standard_unsheared/).
- [6] Zonghao Feng, Shuang Qiu, Lipeng Wang, and Qiong Luo. Accelerating long read alignment on three processors. In *Proceedings of the 48th International Conference on Parallel Processing*, pages 1–10, 2019.
- [7] John E Gorzynski, Sneha D Goenka, Kishwar Shafin, Tanner D Jensen, Dianna G Fisk, Megan E Grove, Elizabeth Spiteri, Trevor Pesout, Jean Monlong, Gunjan Baid, et al. Ultrarapid nanopore genome sequencing in a critical care setting. *New England Journal of Medicine*, 386(7):700–702, 2022.
- [8] Licheng Guo, Jason Lau, Zhenyuan Ruan, Peng Wei, and Jason Cong. Hardware acceleration of long read pairwise overlapping in genome sequencing: A race between fpga and gpu. In *2019 IEEE 27th Annual International Symposium on Field-Programmable Custom Computing Machines (FCCM)*, pages 127–135. IEEE, 2019.
- [9] Koren S. Miga K. et al Jain, M. Nanopore sequencing and assembly of a human genome with ultra-long reads. *Nat Biotechnol*, 36:338–345, 2018.
- [10] Saurabh Kalikar, Chirag Jain, Md Vasimuddin, and Sanchit Misra. Accelerating minimap2 for long-read sequencing applications on modern cpus. *Nature Computational Science*, 2(2):78–83, 2022.
- [11] Heng Li. Minimap2: pairwise alignment for nucleotide sequences. *Bioinformatics*, 34(18):3094–3100, 2018.
- [12] Vladimir Likic. The needleman-wunsch algorithm for sequence alignment. *Lecture given at the 7th Melbourne Bioinformatics Course, Bi021 Molecular Science and Biotechnology Institute, University of Melbourne*, pages 1–46, 2008.
- [13] Xiaomin Lu, Cole Ramos, Fei Zheng, Karl W. Schulz, Jose Santos, Keith Lowery, Nicholas Curtis, and Cristian Di Pietrantonio. Am-dresearch/omniperf: v1.1.0-pr1 (13 oct 2023), October 2023.
- [14] T Manter, S Kersten, and A Hoischen. Long-read sequencing emerging in medical genetics. *front genet*. 2019; 10: 426, 2019.
- [15] Harisankar Sadasivan, Milos Maric, Eric Dawson, Vishanth Iyer, Johnny Israeli, and Satish Narayanasamy. Accelerating minimap2 for accurate long read alignment on gpus. *Journal of biotechnology and biomedicine*, 6(1):13, 2023.
- [16] Hajime Suzuki and Masahiro Kasahara. Acceleration of nucleotide semi-global alignment with adaptive banded dynamic programming. *BioRxiv*, page 130633, 2017.
- [17] Nanopore Tech. Promethion brochure.
- [18] Alberto Zeni, Giulia Guidi, Marquita Ellis, Nan Ding, Marco D Santambrogio, Steven Hofmeyr, Aydin Buluç, Leonid Olikier, and Katherine Yelick. Logan: High-performance gpu-based x-drop long-read alignment. In *2020 IEEE International Parallel and Distributed Processing Symposium (IPDPS)*, pages 462–471. IEEE, 2020.
